# Supplementary material for: A Proton Pump Inhibitor in the Reformulation Setting: Bioequivalence and Potential Implications for Long‐Term Safety
Source: PubMed Central journal article supplement — Clin Transl Sci. 2017 Jun 15;10(5):387–94. doi: 10.1111/cts.12475 (PMC5593167; doi:10.1111/cts.12475), 2017-06-15
Supplement: CTS-10-387-s002.pdf [file CTS-10-387-s002.pdf]

## Supplemental Data-Table B.-Summary of the Human Studies Reviewed

| PPI product | Study                                                                                                            | Number of pts                                                                                                                                                                                                                                    | Results                                                                                                                                                                                                                                                                                                                                                                                                                                                                                                                 |
|-------------|------------------------------------------------------------------------------------------------------------------|--------------------------------------------------------------------------------------------------------------------------------------------------------------------------------------------------------------------------------------------------|-------------------------------------------------------------------------------------------------------------------------------------------------------------------------------------------------------------------------------------------------------------------------------------------------------------------------------------------------------------------------------------------------------------------------------------------------------------------------------------------------------------------------|
| Omeprazole  | O'Connell 2005 (18)<br>US<br>Short-term- 1 wk<br>A randomized, double-blind, placebo-controlled, crossover trial | 18 women<br>mean age was $76 \pm 7$ years<br>(range 65–89 years)                                                                                                                                                                                 | Omeprazole & calcium absorption<br><br>Omeprazole markedly decreased fractional calcium absorption from 9.1% (95% CI): 6.5% to 11.6%) on placebo to 3.5% (95% CI): 1.6% to 5.5%, $P = 0.003$ )<br>The absolute difference in fractional calcium absorption between placebo and omeprazole was $-5.5\%$ (95% CI: $-2.1\%$ to $-9.0\%$ ). This difference represented an average percentage decrease of 41% (95% CI: $-86\%$ to 3%).                                                                                      |
| Any PPIs    | Vestergaard 2006 (30)<br>Denmark<br>Jan-Dec 2000<br>Case-control                                                 | 124,655 cases with fractures;<br>373,962 matched Controls<br><br>Last PPI use of $\leq 1$ year ago and $> 1$ year ago were analyzed                                                                                                              | Risk of fracture & PPI use $\leq 1$ y ago<br><br>Overall fracture risk, aOR = 1.18 (95% CI, 1.12–1.43)<br>Risk of hip fracture, aOR = 1.45 (95% CI, 1.28–1.65)<br>Risk of spine fracture, aOR = 1.60 (95% CI, 1.25–2.04)<br>Risk of forearm fracture, aOR = 0.95 (95% ci, 0.82-1.11)<br><br>Multivariate adjustment. No adjustment for smoking, physical activity, the use of calcium /vitamin D supplements.                                                                                                           |
| Any PPIs    | Yang 2006 (31)<br>UK<br>1987-2003<br>Nested case-control                                                         | 13,556 cases with fractures;<br>135,386 matched controls<br><br>Exposure of PPI $> 1$ year                                                                                                                                                       | Risk of hip fracture & PPI use $> 1$ year, aOR = 1.44 (95% CI, 1.30–1.59)<br>Risk of hip fracture increased with high-dose PPI: (dose defined as dose/day, $>1.75$ doses/day), aOR = 2.65 (95% CI, 1.80-3.90)<br>Risk of hip fracture increased with longer duration of PPI use, 1 yr, aOR = 1.22 (95% CI, 1.15-1.30); 2 years, aOR=1.41 (95%CI, 1.28-1.56); 3 years, 1.54 (95% CI, 1.37-1.73), 4 yr, aOR = 1.59 (95% CI, 1.39-1.80)<br><br>Multivariate adjustment.                                                    |
| Any PPIs    | Yu 2008 (32)<br>US<br><br>Two prospective cohorts of men and women $>65$ yo<br><br>W- 5339<br>M-5755             | Women (4,574 non-PPI/H2RA users, 234 PPI Users, 519 H2RA users);<br>Men (4,920 non-PPI/H2RA users, 487 PPI users, 335 H2RA users)                                                                                                                | Risk of hip fracture & PPI and/or H2RA use<br><br>Risk of hip fracture (multivariate adjusted)<br>Women: aRH = 1.16 (95% CI, 0.80-1.67)<br>Men: aRH = 0.62 (95% CI, 0.26-1.44)<br>Risk of non-spine fracture (multivariate adjusted)<br>Women: aRH = 1.34 (95% CI, 1.10-1.64)<br>Men: aRH = 1.21 (95% CI, 0.91-1.62)<br><br>Multivariate adjustment for age, clinic, race, BMI, alcohol use, calcium use, smoking, and other medications                                                                                |
| Any PPIs    | Targownik 2008 (33)<br>Canada<br>1996 – 2004<br>Case-control                                                     | 15,792 cases with fractures;<br>47,289 matched controls<br><br>Continuous exposure: $> 70\%$ of their person-time before the fracture date classified as PPI exposure time ( $> 0.70$ standard doses per day).                                   | Risk of hip, wrist, spine fractures & PPI use $\geq 7$ years<br>aOR = 1.92 (95% CI, 1.16–3.18)<br><br>Risk of hip fractures &PPI use<br>PPI use $\geq 5$ years, aOR = 1.62 (95% CI, 1.02–2.58)<br>PPI use $\geq 6$ years, aOR = 2.49 (95% CI, 1.33-4.67)<br>PPI use $\geq 7$ years, aOR = 4.55 (95% CI, 1.68–12.29)<br><br>Adjustment for income, region of residence, diagnoses, home care use and multiple medications. No adjustment for alcohol consumption, smoking or the use of calcium / vitamin D supplements. |
| Any PPIs    | Kaye 2008 (34)<br>UK<br>1995 – 2005<br>Nested case-control                                                       | 1,098 cases with fractures;<br>10,923 matched controls<br><br>Men and women aged 50 – 79 years<br>Age, sex, index date and Duration of history recorded match. Analysis restricted to cases with no major medical risk factors for hip fracture. | Risk of hip fracture & PPI use<br><br>Hip fracture RR= 0.9 (95% CI, 0.7–1.11)<br>Among men, for each additional 10 PPI prescriptions, RR = 1.0 (95% CI, 0.9–1.1), among women, 0.9 (95% CI, 0.8–1.0).<br>Among aged 50–59 years, RR = 0.7 (95% CI, 0.4–1.4), 60–69 years RR =1.0 (95% CI, 0.8–1.1), 70–79 years RR = 0.9 (95% CI, 0.8–1.0)                                                                                                                                                                              |
| Any PPIs    | de Vries 2009 (35)<br>UK                                                                                         | 234,144 PPI only users                                                                                                                                                                                                                           | Risk of hip fracture & PPI use                                                                                                                                                                                                                                                                                                                                                                                                                                                                                          |

|                                                                           |                                                                                                                       |                                                                                                                                                                                                                                                                                                                            |                                                                                                                                                                                                                                                                                                                                                                                                                                                                                                                            |
|---------------------------------------------------------------------------|-----------------------------------------------------------------------------------------------------------------------|----------------------------------------------------------------------------------------------------------------------------------------------------------------------------------------------------------------------------------------------------------------------------------------------------------------------------|----------------------------------------------------------------------------------------------------------------------------------------------------------------------------------------------------------------------------------------------------------------------------------------------------------------------------------------------------------------------------------------------------------------------------------------------------------------------------------------------------------------------------|
|                                                                           | 1988-2007<br>Retrospective cohort                                                                                     | Men and women aged > 40 years                                                                                                                                                                                                                                                                                              | Compared to past use, aRR = 1.22 (95% CI, 1.10-1.37) high dose (>1.75 DDD), aRR 1.45 (95% CI, 1.06-1.99) short duration, 1.31 (95% CI, 1.09-1.58) >3 years, aRR 1.17 (95% CI, 0.98-1.41)<br><br>Adjustment for age, comorbidities, smoking, BMI, history of fracture, calcium and vitamin D supplements, and other medications.                                                                                                                                                                                            |
| Omeprazole                                                                | Roux 2009 (36)<br>EU<br>Prospective cohort                                                                            | 1211 postmenopausal women aged 55 – 79 years                                                                                                                                                                                                                                                                               | Vertebral fractures assessed by X-Ray at baseline and end of 6yr F/u & PPI use<br><br>At baseline 5% were using omeprazole.<br>Age-adjusted rates for vertebral fractures were 1.89 (omeprazole users) and 0.60 per 100 person/yrs for nonusers (RR=3.41)(p=0.009)<br>Multivariate analysis risk factors include omeprazole use (RR=3.10, p=0.0271), age>65 (RR=2.34, p=0.44), low lumbar spine BMD (RR=2.38, p=0.04)<br><br>Adjustment for BMI, history of fracture / falls, other medications, and bone mineral density. |
| Omeprazole                                                                | Kirkpantur 2009 (24)<br>Turkey<br>Cross sectional                                                                     | 68 maintenance hemodialysis pts (Group 1–36 PPI users Group 2 (32, PPI nonusers)                                                                                                                                                                                                                                           | Radius, hip, and spine BMD assessment and correlated with PPI use and other variables<br>Mean duration of PPI use was 27 ± 5 mos.<br>PPI users had lower BMD at all sites (p=0.019–0.04)<br>Serum Ca, PTH, phosphate similar in two groups                                                                                                                                                                                                                                                                                 |
| Any PPIs                                                                  | Corley 2010 (37)<br>US<br>1995-2007<br>Case-control                                                                   | 33,752 cases with Fractures;130,471 matched controls                                                                                                                                                                                                                                                                       | Risk of fracture 7 PPI use ≥ 2 years of and 1 other risk factor<br>OR = 1.30 (95% CI, 1.21–1.39)<br><br>Risk of fracture increased with higher PPI dose<br>OR = 1.41 (95% CI, 1.21-1.64)<br>and in longer duration of PPI exposure OR=1.85 (1.41–2.43)<br><br>Statistical adjustment. The increased fracture for PPI use was confined to persons with at least one other risk factor.                                                                                                                                      |
| Omeprazole<br>Esomeprazole<br>Lansoprazole<br>Pantoprazole<br>Rabeprazole | Gray 2010 (38)<br>US<br>Enrollment 1993-2005<br>Prospective cohort<br>130,487 postmenopausal women 50-79yo            | 2,831 PPIs users<br>127,756 non-PPIs Users                                                                                                                                                                                                                                                                                 | Risk of total fractures & PPI use<br><br>Current PPI users<br>Risk of total fractures, aHR = 1.25 (95% CI, 1.15-1.36)<br>Risk of hip fracture, aHR = 1.00 (95% CI, 0.71-1.40)<br>Risk of spine fracture, aHR = 1.47 (95% CI, 1.18-1.82)<br>Risk of wrist fracture, aHR = 1.26 (95% CI, 1.05-1.51)<br><br>Multivariate adjustment for age, race, BMI, smoking, physical activity, history of fracture, comorbidities, and other medications                                                                                 |
| Omeprazole<br>Esomeprazole<br>Lansoprazole<br>Pantoprazole<br>Rabeprazole | Chiu 2010 (39)<br>Taiwan<br>2005-2006<br>Case-control                                                                 | 1241 hip fracture cases (522 men)<br>1241 controls                                                                                                                                                                                                                                                                         | Risk of hip fracture & PPI use<br><br>Dose-response, compared to no use:<br>Cumulative DDDs with PPI last use ≤4 yr preceding hip fracture: ≤18.7 DDD, aOR = 0.78 (95% CI, 0.47-1.29)<br>18.8-91 DDD, aOR = 2.00 (95% CI, 1.28-3.14);<br>>91 DDD, aOR = 2.12 (95% CI, 1.39-3.25)                                                                                                                                                                                                                                           |
| Omeprazole<br>Esomeprazole<br>Rabeprazole<br>Lansoprazole<br>Pantoprazole | Targownik 2010 (21)<br>Canada<br>1984-2004<br>2001-2006<br>2 databases<br>Case-control, cross-sectional, longitudinal | Cross-sectional 2193 cases with osteoporosis at the hip; 5527 controls with normal hip measurements<br>3596 cases with osteoporosis at the lumbar spine<br>10,257 normal controls.<br>Longitudinal 2549 subjects underwent 2 separate BMD assessments<br>The main interval between assessments of BMD - 2.31+/- 0.5 years. | Osteoporosis & PPIs use<br><br>Hip osteoporosis, OR= 0.84 (95% CI, 0.55–1.34)<br>The lumbar spine osteoporosis, OR=0.79 (95% CI, 0.59 –1.06) for PPI use >1500 doses over the previous 5 years.<br>In the longitudinal study no significant decrease was observed in BMD at either site attributable to PPI use.                                                                                                                                                                                                           |

|                                                                           |                                                                                       |                                                                                                                                                                         |                                                                                                                                                                                                                                                                                                                                                                                                                                                                                                                                                    |
|---------------------------------------------------------------------------|---------------------------------------------------------------------------------------|-------------------------------------------------------------------------------------------------------------------------------------------------------------------------|----------------------------------------------------------------------------------------------------------------------------------------------------------------------------------------------------------------------------------------------------------------------------------------------------------------------------------------------------------------------------------------------------------------------------------------------------------------------------------------------------------------------------------------------------|
| Omeprazole<br>Esomeprazole<br>Pantoprazole<br>Lansoprazole<br>Rabeprazole | Pouwels 2011 (40)<br>Netherlands<br>1991-2002<br>Case-control                         | 6,763 hip/femur fracture<br>26,341 controls<br><br>Current users defined as patients who had received at least one PPI dispensing within 30 days before the index date. | Risk of hip/femur fracture & PPI use<br>Distant past use: aOR = 1.24 (95% CI, 1.08-1.43)<br>Past use: aOR = 0.97 (95% CI, 0.74-1.26)<br>Recent use: aOR = 0.96 (95% CI, 0.83-1.12)<br>Current use: aOR = 1.20 (95% CI, 1.04-1.40)<br>Low dose use: aOR=1.21 (95% CI, 0.93-1.57)<br>High dose: aOR=1.35 (95% CI, 1.02-1.78)<br>Short exposure: aOR=1.31 (95% CI, 0.98-1.76)<br>Longer exposure: aOR= 1.09 (95% CI, 0.81-1.47)<br><br>No adjustment for body mass index, alcohol consumption, smoking or the use of calcium / vitamin D supplements. |
| Any PPIs                                                                  | Abrahamsen 2011 (41)<br>Denmark<br>1996-2005<br>Cohort                                | 38,088 incident<br>Alendronate users:<br>6,431 men, 31,657 women                                                                                                        | HR hip fracture & PPI use<br><br>Alendronate, highly refill compliant, HR=1.28 (95% CI, 1.05-1.56)<br>Alendronate, moderately refill compliant, HR=1.53 (95% CI, 1.02-2.29)                                                                                                                                                                                                                                                                                                                                                                        |
| Prilosec<br>Nexium<br>Prevacid<br>Protonix<br>Aciphex                     | Khalili 2012 (25)<br>US<br>1976-2008<br>Prospective cohort                            | 79,899 eligible women<br>5,341 regular PPI users<br>74,558 non-users                                                                                                    | Risk of hip fracture & PPI use<br>PPI use incr. from 6.7% in 2000 to 18.9% in 2008;<br>Abs. risk of hip fracture for regular PPI users 2.02 per 1000 person years vs 1.51 per 1000 PY for non-users;<br>PPI use of 2 years, aHR=1.36 (95% CI, 1.12-1.65)<br>4 years, aHR=1.42 (95% CI, 1.05-1.93)<br>6-8 years, aHR=1.54 (95% CI, 1.03-2.31)                                                                                                                                                                                                       |
| Any PPIs                                                                  | Targownik 2012 (22)<br>Canada<br>1995-1997<br>10yrs follow-up<br>Retrospective cohort | 8,340 subjects<br>PPI users (N=228)<br>Non-PPI users (N=8,112)                                                                                                          | BMD & PPI use<br><br>PPI users had lower BMD at baseline than PPI non-users, but PPI use over 10 years did not appear to be associated with accelerated BMD loss.                                                                                                                                                                                                                                                                                                                                                                                  |
| Any PPIs                                                                  | Fraser 2013 (28)<br>Canada<br>1995-1997 enrollment<br>10 year F/U<br>Cohort           | 9,423<br>6,539 females<br>2,884 males                                                                                                                                   | Risk of fracture & PPI use<br><br>PPI exposure, time-dependent: HR=2.24 (95% CI, 1.27-3.96), aHR=1.75 (95% CI, 0.94-3.26)<br>PPI ever used: HR=1.76 (95% CI, 1.15-2.71); aHR=1.52 (95% CI, 0.99-2.35)                                                                                                                                                                                                                                                                                                                                              |
| Any PPIs                                                                  | Abrahamsen 2013 (27)<br>Denmark<br>2000<br>Case-control                               | 10,530 hip fracture cases                                                                                                                                               | Risk of hip fracture & PPI use<br><br>Hip fracture with PPI use: aOR=1.13 (95% CI, 1.05-1.21)<br>Age >70 years: PPI: aOR=1.14 (95% CI, 1.06-1.22)                                                                                                                                                                                                                                                                                                                                                                                                  |
| Omeprazole<br>Esomeprazole<br>Pantoprazole<br>Rabeprazole<br>Lansoprazole | Lee 2013 (42)<br>Korea<br>2005-2006<br>Case-control                                   | 24,710 cases<br>98,642 controls<br>≥65 years old                                                                                                                        | Risk of incident hip fracture & PPI use<br><br>Pantoprazole, aOR=1.71 (95% CI, 1.39-2.11)<br>Rabeprazole, aOR=1.35 (95% CI, 1.10-1.67),<br>Omeprazole, aOR=1.22 (95% CI, 1.08-1.38)<br>Esomeprazole and Lansoprazole did not show increased risk of fracture                                                                                                                                                                                                                                                                                       |
| Omeprazole<br>Esomeprazole<br>Rabeprazole<br>Pantoprazole<br>Lansoprazole | Reyes 2013 (43)<br>Spain<br>2007-2010<br>Case-control                                 | 358 cases<br>698 controls                                                                                                                                               | Risk of hip fracture & PPI use<br><br>OR=1.44 (95% CI, 1.09-1.89)<br>aOR=1.24 (95% CI, 0.93-1.65)                                                                                                                                                                                                                                                                                                                                                                                                                                                  |
| Any PPIs                                                                  | Maggio 2013 (23)<br>Italy<br>Retrospective cohort                                     | 1038 participants<br>36 PPI users<br>1002 non-users<br>65 years or older                                                                                                | BMD & PPI use<br><br>PPI users showed age- and sex-adjusted lower vBMDt than nonusers (180.5±54.8 vs. 207.9±59.4, p=0.001)<br><br>Adjustment for caloric intake, PTH, Vitamin D, calcium intake, levels of E2, IL-6, IGF-1 and Bio-T.                                                                                                                                                                                                                                                                                                              |
| Esomeprazole<br>Rabeprazole<br>Lansoprazole                               | Sharara 2013 (19)<br>Lebanon<br>Short-term-12wks<br>Prospective matched controlled    | 58 participants (29 per group)<br>Healthy adult males (age 18-50 years)                                                                                                 | Calcium/Bone metabolism & PPI use<br>No difference between the groups in levels of Albumin, Phosphate, Calcium, Ionized Calcium PTH, 25-OH-vitamin D, Osteocalcin, C-terminal cross-linked telopeptides of type I collagen before and after PPI treatment.                                                                                                                                                                                                                                                                                         |
| Esomeprazole<br>Lansoprazole<br>Pantoprazole                              | Ozdil 2013 (20)<br>Turkey<br>2009-2011                                                | 114 GERD patients (18-56 years)<br>110 healthy controls                                                                                                                 | Bone density & PPIs use<br>BMD by using dual-energy X-ray absorptiometry at lumbar spine and femur neck.                                                                                                                                                                                                                                                                                                                                                                                                                                           |

|                                                                           |                                                                                    |                                                                                                                          |                                                                                                                                                                                                                                                                                                                                                                                                                                                                                                                                                                                   |
|---------------------------------------------------------------------------|------------------------------------------------------------------------------------|--------------------------------------------------------------------------------------------------------------------------|-----------------------------------------------------------------------------------------------------------------------------------------------------------------------------------------------------------------------------------------------------------------------------------------------------------------------------------------------------------------------------------------------------------------------------------------------------------------------------------------------------------------------------------------------------------------------------------|
|                                                                           | Prospective case-control study                                                     | The mean duration of treatment with PPIs - 8.5 ± 2.3 months.<br>F/u 6 months                                             | Significant reduction in BMD in PPIs users. The mean reduction in total vertebra T score compared to pre-treatment values 0.23 ± 0.42 units (95 % CI 0.15–0.30) (p<0.01); the mean reduction in the femur T score 0.10 ± 0.40 units (95 % CI 0.03–0.18) (p = 0.03). Reduction following treatment in L4 and total vertebra T scores of lansoprazole group - significantly higher than of pantoprazole group (p = 0.04). Reduction in femur T score of esomeprazole group - higher than of lansoprazole group and pantoprazole group.<br>No statistically significant differences. |
| Any PPIs                                                                  | Ding 2014 (44)<br>US<br>1999-2002<br>Retrospective cohort                          | 1,604 PPI users<br>23,672 nonusers                                                                                       | Any fracture & PPI use, aHR=1.27 (95% CI, 1.12-1.43)<br>Hip fracture: aHR=1.32 (95% CI, 1.01-1.71)<br>Vertebral fracture: aHR = 1.69 (95% CI, 1.26–2.27)<br><br>Adjustment for gender, race, age, BMI, comorbidity, smoking status and medication usage                                                                                                                                                                                                                                                                                                                           |
| Omeprazole<br>Pantoprazole                                                | Adams 2014 (45)<br>US<br>Cases: 1997-2006<br>Pharm. data 1991-2006<br>Case-control | 6774 pairs of men aged 45 years or older w matched on age, race, and medical center.<br>Cases with incident hip fracture | Risk of hip fracture &PPI use<br>Omeprazole use<br>Ever, OR=1.31 (95% CI, 1.18-1.46)<br>aOR=1.13 (95% CI, 1.01-1.27)<br>Greatest adherence (medication possession ratio > 80%)<br>aOR=1.33 (95% CI, 1.09-1.62)<br>Highest tertile of duration, aOR=1.23 (95% CI, 1.02-1.48)<br>Recent use, aOR=1.22 (95% CI, 1.02-1.47)<br>Pantoprazole use<br>Ever, OR=1.25 (95% CI, 1.11-1.41)<br>aOR=1.10 (95% CI, 0.97-1.24)<br>Longest duration aOR=1.25 (95% CI, 1.02-1.53)<br>Most recent use aOR=1.38 (95% CI, 1.12-1.71)<br><br>Adjustment for comorbidities.                            |
| Omeprazole                                                                | Ceo Soriano 2014 (26)<br>UK<br>2000-2008<br>Cohort,<br>Nested case-control         | 1,538,855 contributed p/time<br>10,958 cases of hip fracture; 10,000 controls                                            | Risk of hip fracture & PPIs use<br>Overall incidence of hip fracture per 1000 person-years – 1.31 (95% CI, 1.28–1.33).<br>Risk of hip fracture & current PPI use, aOR=1.07 (95% CI, 1.30–1.48)<br>Recent use, aOR=1.29 (95% CI, 1.52–2.15)<br>Medium single use PPI dose: aOR=1.11 (95% CI, 1.01-1.22)<br>High single use PPI dose: aOR=1.31 (95% CI, 1.06-1.16)<br>Omeprazole: aOR=1.14 (95% CI, 1.03-1.27)<br>Multivariate adjustment.                                                                                                                                          |
| Any PPIs                                                                  | Moberg 2014 (46)<br>Sweden<br>1995-2012<br>Retrospective cohort                    | 6917 postmenopausal women                                                                                                | Risk of fracture & current PPI users, OR=2.53 (95% CI, 1.28–4.99)<br>Women having had a fracture after the age of 40, but before inclusion in the study, OR=1.70 (95% CI 1.24–2.32)<br>Use of PPI and HT, OR=3.37 (95% CI, 1.96–5.80)<br>On PPIs only, without HT use, OR=1.13 (95%, CI 0.57–2.24)<br><br>Multivariate adjustment for age, BMI and current smoking status                                                                                                                                                                                                         |
| Omeprazole<br>Esomeprazole<br>Pantoprazole<br>Lansoprazole<br>Rabeprazole | Lewis 2014 (29)<br>Australia<br>2003-2008<br>Prospective cohort                    | 1025 with bone fracture<br><br>Elderly postmenopausal women                                                              | Risk of falls and fracture & long-term PPI therapy<br>Risk of fall, aOR=2.17 (95% CI, 1.25-3.77)<br>Risk of fractures, aOR=1.95 (95% CI, 1.20-3.16)<br><br>Adjustment for age, low BMI, physical activity, smoked ever, diabetes, and CNS medication use.                                                                                                                                                                                                                                                                                                                         |
| Any PPIs                                                                  | Prieto-Alhambra 2014 (47)<br>Spain<br>2006-2011<br>Retrospective cohort            | 7,449 out of 21,385 oral bisphosphonate new users<br><br>>6 months of therapy                                            | Fracture risk & PPI use<br><br>Incidence of fracture while on treatment - 3.4/100 person-years (95%CI, 3.1-3.7).<br>PPI use, SHR=1.22 (95% CI, 1.02-1.46)                                                                                                                                                                                                                                                                                                                                                                                                                         |
| Any PPIs                                                                  | Freedberg 2015 (48)<br>UK<br>1994-2013<br>Nested case-control                      | 124,799 cases and 605,643 controls<br>4-29 years old                                                                     | Risk of fracture & PPI use<br>Among children<18yo, aOR=1.13 (95% CI, 0.92-1.39)<br>Among young adults 18–29 yo, aOR=1.39 (95% CI, 1.26-1.53)                                                                                                                                                                                                                                                                                                                                                                                                                                      |

|          |                                                                                                                 |                                                                                                  |                                                                                                                                                                                                                           |
|----------|-----------------------------------------------------------------------------------------------------------------|--------------------------------------------------------------------------------------------------|---------------------------------------------------------------------------------------------------------------------------------------------------------------------------------------------------------------------------|
|          |                                                                                                                 |                                                                                                  | Adjustment for prior use of histamine-2 receptor antagonists, anti-epileptic drugs, opiates, and oral glucocorticoids.                                                                                                    |
| Any PPIs | Solomon 2015 (49)<br>US<br>Enrollment 1996-98<br>A median 9.9 yrs f/u<br>Community-based<br>longitudinal cohort | 207 new users of PPIs, 185<br>new users of H2RAs, and<br>1,676 non-users.<br>Mean age - 50 years | Bone mineral density & PPIs or H2 Receptor Antagonists<br>use<br><br>No difference in the annualized BMD change at the<br>lumbar spine, femoral neck, or total hip in PPI users<br>compared with H2RA users or non-users. |
